# Supplementary material
Source: PubMed Central journal article supplement (PMC11108385)

## VGLUT1 positive puncta

### Primary dendrites

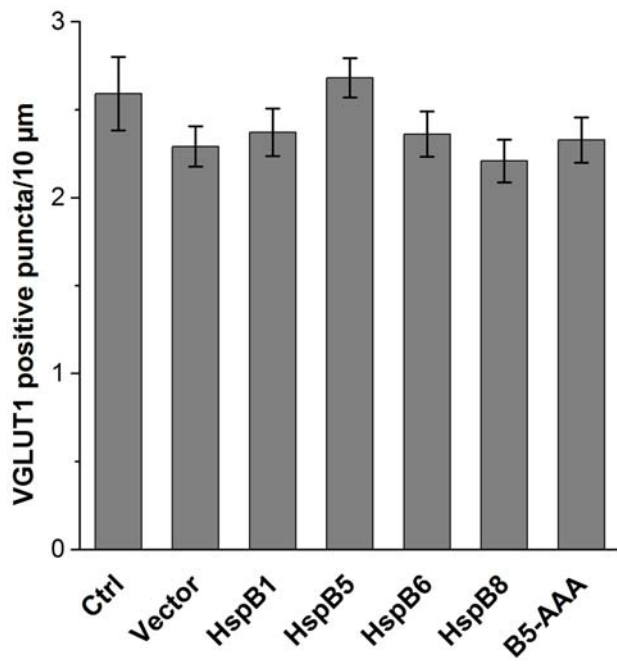

### Secondary dendrites

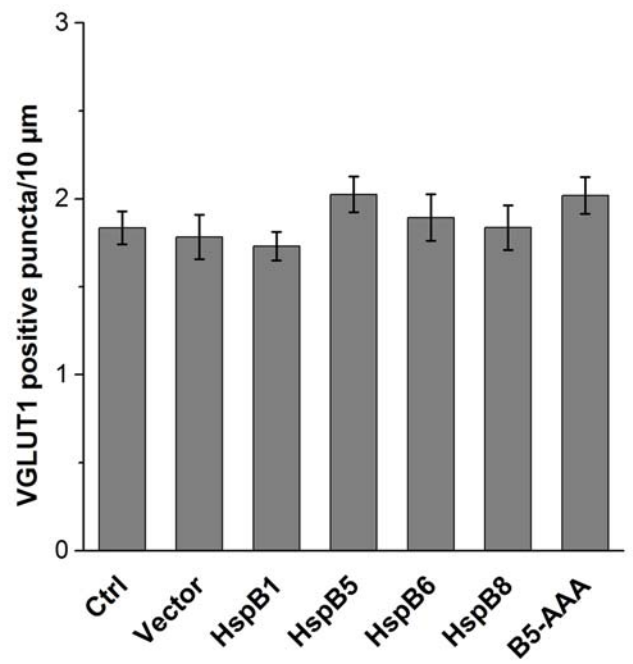

Supplement: 18_2016_2219_MOESM2_ESM.pdf [file 18_2016_2219_MOESM2_ESM.pdf]
